# Supplementary material
Source: publisher figshare collection journal article supplement (https://acs.figshare.com/ndownloader/files/4040731)
Supplement: Supplementary file 1 [file 4040731]

# Single-Antibody, Targeted Nanoparticle Delivery of Camptothecin

by

Han Han and Mark E. Davis\*

Chemical Engineering, California Institute of Technology, Pasadena, CA 91125

## Supplementary Information:

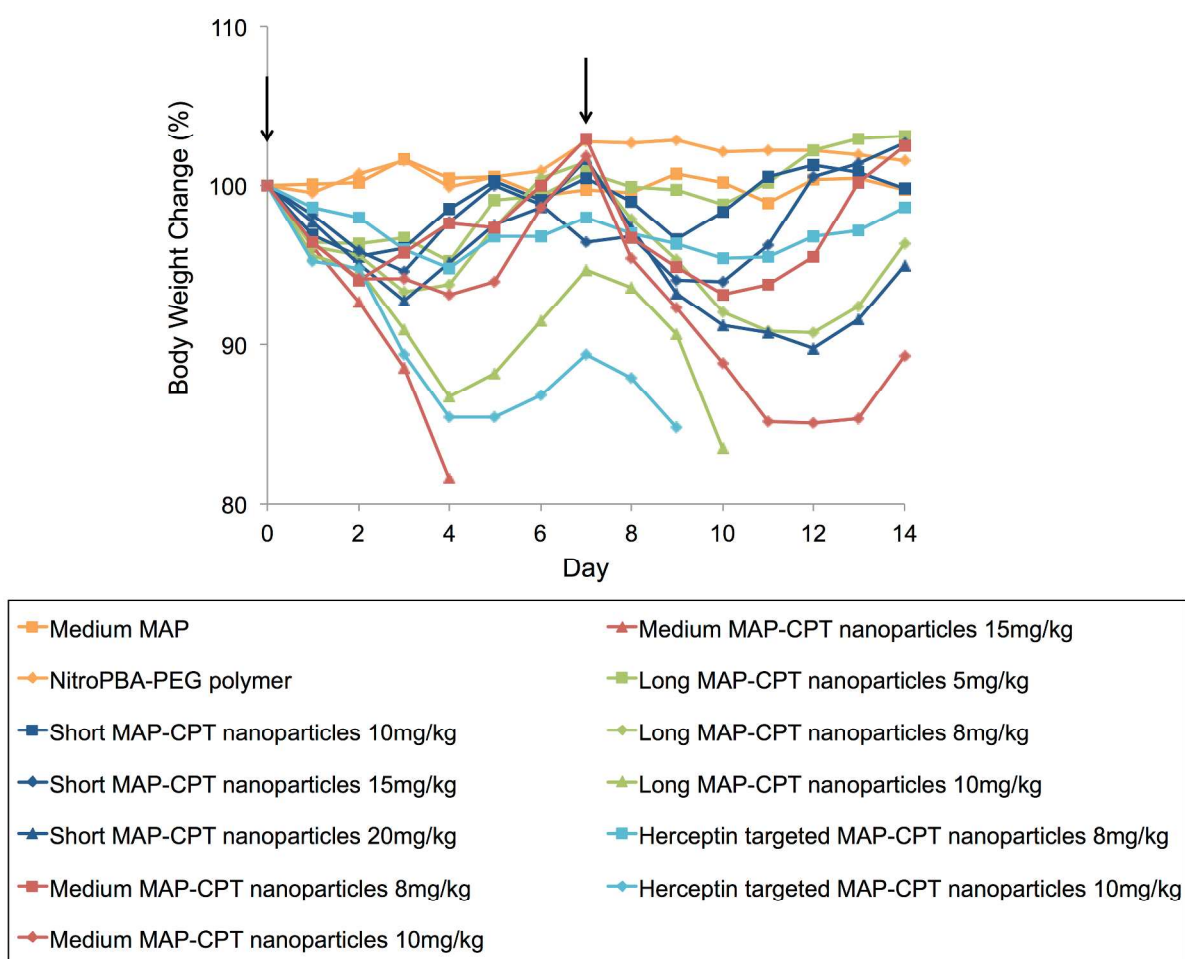

**Supplementary Figure 1.** Determination of maximum tolerable dose (MTD) in female NCr nude mice; arrows indicate treatments; all groups containing CPT are based on mg CPT/kg.

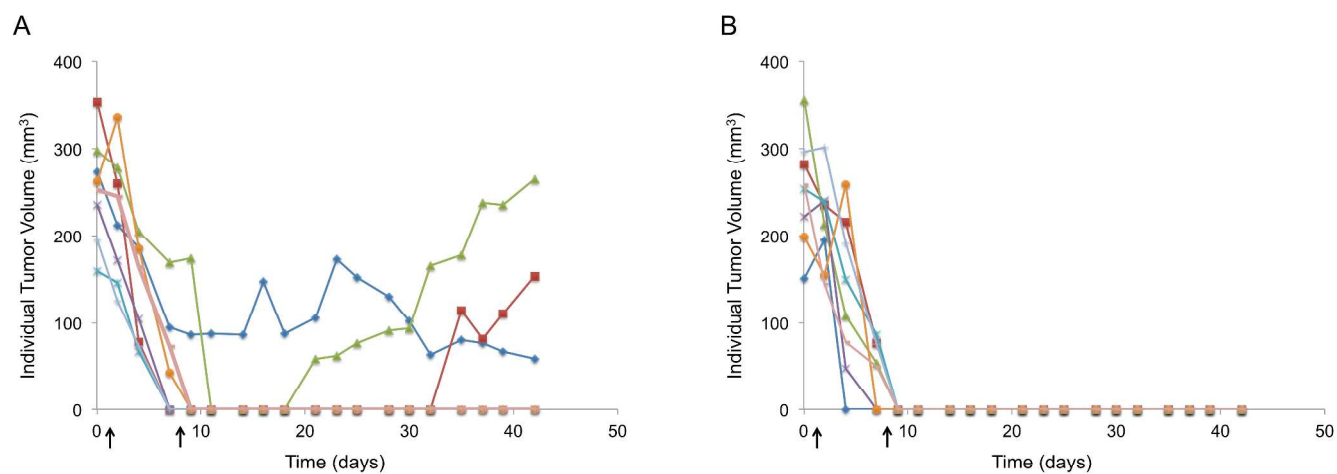

**Supplementary Figure 2.** Antitumor efficacy results for female NCr nude mice treated with (A) Herceptin at 5.9 mg/kg. (B) Herceptin targeted MAP-CPT nanoparticles (5.9 mg Herceptin equivalent/kg and 1 mg CPT/kg).
